# Supplementary material for: Molecular Epidemiology and Characterization of Picobirnavirus in Wild Deer and Cattle from Australia: Evidence of Genogroup I and II in the Upper Respiratory Tract
Source: MDPI journal article supplement (doi:10.3390/v13081492), 2021-07-29
Supplement: s1 [file s1]

|         | ..... ..... | ..... ..... | ..... ..... | ..... ..... | ..... ..... | ..... ..... | ..... ..... | ..... ..... | ..... ..... | ..... ..... | ..... ..... |
|---------|-------------|-------------|-------------|-------------|-------------|-------------|-------------|-------------|-------------|-------------|-------------|
|         | 5           | 15          | 25          | 35          | 45          | 55          | 65          | 75          | 85          | 95          |             |
| LN7_f   | *****AGC    | T**CT*AA*C  | **GTTTACG*  | *TG*G*AAGT  | AATT*AGAAA  | GAAT*ACAGA  | AATCT*CAGC  | GCAGTGGG*A  | CGA**C***C  | TAT*G**T**  |             |
| N329_f  | *****GTT    | A**TT*AG*C  | **ATTTTCC*  | *CT*A*AAAG  | TAAT*CAGAT  | GCTT*ACAGC  | ATTCA*CAAC  | TCCTTGGG*A  | AGA**T***C  | TAT*A**G**  |             |
| N329_ns | *****GTT    | A**TT*AG*C  | **ATTTTCC*  | *CT*A*AAAG  | TAAT*CAGAT  | GCTT*ACAGC  | ATTCA*CAAC  | TCCTTGGG*A  | AGA**T***C  | TAT*A**G**  |             |
| N329_t  | *****GTT    | A**TT*AG*C  | **ATTTTCC*  | *CT*A*AAAG  | TAAT*CAGAT  | GCTT*ACAGC  | ATTCA*CAAC  | TCCTTGGG*A  | AGA**T***C  | TAT*A**G**  |             |
| N360_s  | *****GTT    | A**TT*AG*C  | **ATTTTCC*  | *CT*A*AAAG  | TAAT*CAGAT  | GCTT*ACAGC  | ATTCA*CAAC  | TCCTTGGG*A  | AGA**T***C  | TAT*A**G**  |             |
| N340_s  | *****GTT    | A**TT*AG*C  | **ATTTTCC*  | *CT*A*AAAG  | TAAT*CAGAT  | GCTT*ACAGC  | ATTCA*CAAC  | TCCTTGGG*A  | AGA**T***T  | TAT*G**G**  |             |
| N332_ns | *****GTT    | A**TT*AG*C  | **ATTTTCC*  | *CT*A*AAAG  | TAAT*CAGAT  | GCTC*CCAGC  | ATTCG*CTAC  | TCCTTGGG*T  | CGT**T***C  | TAT*G**G**  |             |
| N346_s  | *****TAT    | T**CT*AG*T  | **GTTTACC*  | *CT*G*AAGT  | GATC*AGGAT  | GCTC*TGTTT  | CTTCA*AAGC  | TAAGTGGG*A  | AGA**T***C  | TAT*A**G**  |             |
| LV15_f  | *****AGT    | A**CT*AA*A  | **ATTTTCC*  | *CG*G*AAAT  | CGTC*AGGAG  | TCGC*TCAAC  | ACTCG*CAAG  | TAGAGAAG*G  | ACT**C***C  | TAT*A**G**  |             |
| V85_s   | *****AGT    | A**CT*AA*A  | **ATTTTCC*  | *CG*G*AAAT  | CGTC*AGGAG  | TCGC*TCAAC  | ACTCG*CAAG  | TAGAGAAG*G  | ACT**C***C  | TAT*A**G**  |             |
| N320_f  | *****AGT    | A**CT*AA*A  | **ATTTTCC*  | *CG*G*AAAT  | CGTC*AGGAG  | TCGC*TCAAC  | ACTCG*CAAG  | TAGAGAAG*G  | ACT**C***T  | TAT*A**G**  |             |
| N327_f  | *****AGT    | A**CT*AA*A  | **ATTTTCC*  | *CG*G*AAAT  | CGTC*AGGAG  | TCGC*TCAAC  | ACTCG*CAAG  | TAGAGAAG*G  | ACT**C***T  | TAT*A**G**  |             |
| N325_f  | *****AGT    | A**CT*AA*A  | **ATTTTCC*  | *CG*G*AAAT  | CGTC*AGGAG  | TCGC*TCAAC  | ACTCG*CAAG  | TAGAGAAG*G  | ACT**C***T  | TAT*A**G**  |             |
| N331_f  | *****AGT    | A**CT*AA*A  | **ATTTTCC*  | *CG*G*AAAT  | CGTC*AGGAG  | TCGC*TCAAC  | ACTCG*CAAG  | TAGAGAAG*G  | ACT**C***T  | TAT*A**G**  |             |
| N331_n  | *****AGT    | A**CT*AA*A  | **ATTTTCC*  | *CG*G*AAAT  | CGTC*AGGAG  | TCGC*TCAAC  | ACTCG*CAAG  | TAGAGAAG*G  | ACT**C***T  | TAT*A**G**  |             |
| N331_t  | *****AGT    | A**CT*AA*A  | **ATTTTCC*  | *CG*G*AAAT  | CGTC*AGGAG  | TCGC*TCAAC  | ACTCG*CAAG  | TAGAGAAG*G  | ACT**C***T  | TAT*A**G**  |             |
| N349_f  | *****AGT    | A**CT*AA*A  | **ATTTTCC*  | *CG*G*AAAT  | CGTC*AGGAG  | TCGC*TCAAC  | ACTCG*CAAG  | TAGAGAAG*G  | ACT**C***T  | TAT*A**G**  |             |
| LV2_f   | *****GAC    | A**CC*GG*A  | **AGCTGGC*  | *TG*C*TTG   | AATC*AGAGT  | TGGA*CACAC  | ATTCG*CACT  | TCAGTGGG*A  | AGA**C***T  | GCA*T**G**  |             |
| LV7_f   | *****GAC    | A**CC*GG*A  | **AGCTGGC*  | *TG*C*TTG   | AATT*AGAAT  | TGTG*CGCTC  | AGTCC*CGCT  | TGAGTGGG*T  | AGA**C***T  | GCA*G**A**  |             |
| LV10_f  | *****GAC    | A**CC*GG*A  | **AGCTGGC*  | *TG*C*TTG   | AATT*AGAAT  | TGTG*CGCTC  | AGTCC*CGCT  | TGAGTGGG*T  | AGA**C***T  | GCA*G**A**  |             |
| LV12_f  | *****GAC    | A**CC*GG*A  | **AGCTGGC*  | *TG*C*TTG   | AATT*AGAAT  | TGTG*CGCTC  | AGTCC*CGCT  | TGAGTGGG*T  | AGA**C***T  | GCA*G**A**  |             |
| V92_f   | *****GAC    | A**CC*GG*A  | **AGCTGGC*  | *TG*C*TTG   | AATT*AGAAT  | TGTG*CGCTC  | AGTCC*CACT  | TGAGTGGG*T  | AGA**C***T  | GCA*G**A**  |             |
| N325_ns | *****GAC    | A**CC*AA*A  | **AGCCGGT*  | *CG*C*TTA   | AATC*AGGAT  | TGTA*TGCTC  | ATAGC*CACT  | CGAGTGGG*T  | CGA**C***T  | GCA*G**A**  |             |
|         | CGATGTC     | AA T T GA   | T T C C     |             | C           | T           | C           | T           | GA TAC      | C CC TG     |             |
|         | ..... ..... | ..... ..... | ..... ..... | ..... ..... | ..... ..... | ..... ..... | ..... ..... | ..... ..... | ..... ..... | ...         |             |
|         | 105         | 115         | 125         | 135         | 145         | 155         | 165         | 175         | 185         |             |             |

|         |            |            |            |            |                                                                                              |            |           |            |         |     |
|---------|------------|------------|------------|------------|----------------------------------------------------------------------------------------------|------------|-----------|------------|---------|-----|
| LN7_f   | *CTT**A*TT | **GGAC**T* | *GCTTACCC* | C**CAAG*** | ***  AGTG  | GCGAACCAA* | C*AT***** | *****      | *G***** | *** |
| N329_f  | *CAA**C*TT | **ATTC**A* | *AGAAACAC* | G**TAAG*** | ***  CAAG | GCCAGCATA* | T*AT***** | *****      | *A***** | *** |
| N329_ns | *CAA**C*TT | **ATTC**A* | *AGAAACAC* | G**TAAG*** | ***  CAAG | GCCAGCATA* | T*AT***** | *****      | *A***** | *** |
| N329_t  | *CAA**C*TT | **ATTC**A* | *AGAAACAC* | G**TAAG*** | ***  CAAG | GCCAGCATA* | T*AT***** | *****      | *A***** | *** |
| N360_s  | *CAA**C*TT | **ATTC**A* | *AGAAACAC* | G**TAAG*** | ***  CGAG | GCCAGCATA* | T*AT***** | *****      | *A***** | *** |
| N340_s  | *CAA**C*TT | **ATTC**A* | *AGAAACAC* | G**TAAG*** | ***  AAAG | GCCAGCATA* | T*AT***** | *****      | *A***** | *** |
| N332_ns | *TTG**C*TT | **ATTC**A* | *AGAAACGC* | G**CAAG*** | ***  AAAG | GCCAACATA* | T*TA***** | *****      | *A***** | *** |
| N346_s  | *CAA**C*AT | **AGAT**T* | *GAGGACTT* | A**TCTT*** | ***  ACGG | GCCAAAACG* | A*AT***** | *****      | *G***** | *** |
| LV15_f  | GGAG**G*AT | **GGTC**T* | *GCGTACTC* | A**CTCT*** | ***CCTAACG                                                                                   | GCTCACAGG* | T*TT***** | *****      | *G***** | *** |
| V85_s   | GGAG**G*AT | **GGTC**T* | *GCGTACTC* | A**CTCT*** | ***CCTAACG                                                                                   | GCTCACAGG* | T*TT***** | *****      | *G***** | *** |
| N320_f  | GGAG**G*AT | **GGTC**T* | *GCGTACTC* | A**CTCT*** | ***CCTAACG                                                                                   | GCTCACAGG* | T*TT***** | *****      | *G***** | *** |
| N327_f  | GGAG**G*AT | **GGTC**T* | *GCGTACTC* | A**CTCT*** | ***CCTAACG                                                                                   | GCTCACAGG* | T*TT***** | *****      | *G***** | *** |
| N325_f  | GGAG**G*AT | **GGTC**T* | *GCGTACTC* | A**CTCT*** | ***CCCAACG                                                                                   | GCTCACAGG* | T*TT***** | *****      | *G***** | *** |
| N331_f  | GGAG**G*AT | **GGTC**T* | *GCGTACTC* | A**CTCT*** | ***CCCAACG                                                                                   | GCTCACAGG* | T*TT***** | *****      | *G***** | *** |
| N331_n  | GGAG**G*AT | **GGTC**T* | *GCGTACTC* | A**CTCT*** | ***CCCAACG                                                                                   | GCTCACAGG* | T*TT***** | *****      | *G***** | *** |
| N331_t  | GGAG**G*AT | **GGTC**T* | *GCGTACTC* | A**CTCT*** | ***CCCAACG                                                                                   | GCTCACAGG* | T*TT***** | *****      | *G***** | *** |
| N349_f  | GGAG**G*AT | **GGTC**T* | *GCGCACTC* | A**CTCT*** | ***CCTAACG                                                                                   | GCTCACAGG* | T*TT***** | *****      | *G***** | *** |
| LV2_f   | *CTT**T*TT | **GCAC**A* | *AGGTGTGC* | T**GAAG*** | ***CCGATGA                                                                                   | ACGCTGTGA* | C*CT***** | *****      | *G***** | *** |
| LV7_f   | *CTC**A*TC | **GCAT**T* | *AAGTGTGC* | A**AAAG*** | ***CCCGACA                                                                                   | AAGCAGCGA* | A*TA***** | *****      | *G***** | *** |
| LV10_f  | *CTC**A*TC | **GCAT**T* | *AAGTGTGC* | A**AAAG*** | ***CCCGACA                                                                                   | AAGCAGCGA* | A*TA***** | *****      | *G***** | *** |
| LV12_f  | *CTC**A*TC | **GCAT**T* | *AAGTGTGC* | A**AAAG*** | ***CCCGACA                                                                                   | AAGCAGCGA* | A*TA***** | *****      | *G***** | *** |
| V92_f   | *CTC**A*TC | **GCAT**C* | *AAGTGTGC* | G**AAAG*** | ***CCCGACA                                                                                   | AAGCAGCGA* | C*TT***** | *****      | *G***** | *** |
| N325_ns | *TTG**T*TT | **CCAT**G* | *GAGTGTGC* | G**AAAG*** | ***CCTCATG                                                                                   | AAGCAGCAA* | A*TT***** | *****      | *G***** | *** |
|         | G GG T     | GA GT A A  | T AC       | CAG TGG    |                                                                                              | T G GGTGA  | GACACCTA  | A ATGGATGC | ACA     |     |

**Figure S1.** Alignment of the partial RNA-dependent RNA polymerase (RdRp) gene sequences of PBVs GII discovered in the present study. A ‘\*’ denotes an identical nucleotide residue, whilst ‘-’ indicates absence of nucleotide residue. Numbers to the top indicate the positions of the nucleotide for respective PBV strains. Gap positions are highlighted in green.
